# Supplementary material for: Differential effects of sex on longitudinal patterns of cognitive decline in Parkinson’s disease
Source: J Neurol. 2021 Jan 5;268(5):1903–12. doi: 10.1007/s00415-020-10367-8 (PMC8068663; doi:10.1007/s00415-020-10367-8)
Supplement: Supplementary file 1 — Supplementary file1 (DOCX 28 KB) [file 415_2020_10367_MOESM1_ESM.docx]

**Differential Effects of Sex on Longitudinal Patterns of Cognitive Decline in Parkinson’s disease**

Megan C. Bakeberg, BBMSc(Hons) 1,2, Anastazja M. Gorecki, BSc(Hons)1,3, Jade E. Kenna BSc(Hons)1,2, Alexa Jefferson, BN1, Michelle Byrnes, MPsych, PhD1,2, Soumya Ghosh, MBBS, PhD, FRACP1,2, Malcolm K. Horne, MBBS, PhD, FRACP4,5, Sarah McGregor BSc(Hons)5, Rick Stell, MBBS, RACP1,2, Sue Walters, BA1, Paola Chivers, PhD6,7, Samantha J. Winter, PhD1,6, Frank L. Mastaglia, MBBS, MD, FRACP1,2 and Ryan S. Anderton, PhD1,2,6*

1Perron Institute for Neurological and Translational Science, Nedlands

2 Centre for Neuromuscular and Neurological Disorders, University of Western Australia, Nedlands, Western Australia, Australia.
3 School of Biological Sciences, University of Western Australia, Crawley

4 Florey Institute for Neuroscience and Mental Health, University of Melbourne, Parkville Victoria, Australia.

5Centre for Clinical Neurosciences and Neurological Research, St Vincent’s Hospital Melbourne, Fitzroy, Victoria, Australia.
6 Institute for Health Research and School of Health Sciences, University of Notre Dame Australia, Fremantle, Western Australia, Australia.

7 Exercise Medicine Research Institute & School of Medical and Health Sciences, Edith Cowan University, Joondalup, Western Australia, Australia.

***Author correspondence:** Dr Ryan Anderton, School of Health Sciences, University of Notre Dame Australia, 19 Mouat Street, Fremantle, WA 6959, Australia
Tel: *+61 8 9433 0670*; Email: ryan.anderton@nd.edu.au

**Supplementary data**

**Supplementary Table 1.** Individual generalized linear models assessing cross-sectional associations between participant cognitive scores and clinical characteristics.

| **Outcome** | **Model** | **Naïve** | | | |
| --- | --- | --- | --- | --- | --- |
| **Intercept** | **β-Coefficient** | **SE** | ***pb* value** |
| ACE-R total score | Age at assessment | 109.239 | -0.314 | 0.058 | **<.001** |
| ACE-R total score | Age at onset | 96.770 | -0.138 | 0.054 | **.010** |
| ACE-R total score | Disease duration | 91.979 | -0.389 | 0.096 | **<.001** |
| ACE-R total score | LEDD | 90.517 | -0.002 | 0.001 | **.049** |
| ACE-R total score | No DBS* | 85.846 | 3.388 | 1.818 | .062 |
| Attention & orientation | Age at assessment | 19.146 | -0.028 | 0.009 | **.002** |
| Attention & orientation | Age at onset | 17.518 | -0.003 | 0.008 | .739 |
| Attention & orientation | Disease duration | 17.878 | -0.065 | 0.014 | **<.001** |
| Attention & orientation | LEDD | 17.610 | -3.1E-4 | 1.5E-4 | **.041** |
| Attention & orientation | No DBS* | 16.795 | 0.638 | 0.266 | **.016** |
| Memory score | Age at assessment | 29.960 | -0.119 | 0.020 | **<.001** |
| Memory score | Age at onset | 26.049 | -0.067 | 0.019 | **<.001** |
| Memory score | Disease duration | 23.061 | -0.101 | 0.034 | **.003** |
| Memory score | LEDD | 22.530 | -3.9E-4 | 3.4E-4 | .256 |
| Memory score | No DBS* | 20.923 | 1.483 | 0.631 | **.019** |
| Fluency score | Age at assessment | 13.367 | -0.052 | 0.018 | **.004** |
| Fluency score | Age at onset | 10.682 | -0.012 | 0.017 | .467 |
| Fluency score | Disease duration | 10.746 | -0.098 | 0.029 | **.001** |
| Fluency score | LEDD | 10.142 | -2.3E-4 | 3.1E-4 | .455 |
| Fluency score | No DBS* | 8.744 | 1.375 | 0.558 | **.014** |
| Language score | Age at assessment | 27.576 | -0.043 | 0.011 | **<.001** |
| Language score | Age at onset | 26.084 | -0.022 | 0.009 | **.022** |
| Language score | Disease duration | 25.144 | -0.041 | 0.018 | **.019** |
| Language score | LEDD | 25.206 | 4.3E-4 | 1.7E-4 | **.011** |
| Language score | No DBS* | 24.897 | -0.092 | 0.328 | .780 |
| Visuospatial-perceptual score | Age at assessment | 17.642 | -0.046 | 0.014 | **.001** |
| Visuospatial-perceptual score | Age at onset | 15.291 | -0.011 | 0.013 | .374 |
| Visuospatial-perceptual score | Disease duration | 15.344 | -0.087 | 0.022 | **<.001** |
| Visuospatial-perceptual score | LEDD | 15.161 | -0.001 | 2.2E-4 | **.013** |
| Visuospatial-perceptual score | No DBS* | 14.179 | 0.534 | 0.419 | .203 |

b*p* value taken from GLM without correction for covariates.

*Comparison category set to zero.

β, beta; SE, standard error; LEDD, Levodopa Equivalent Daily Dose; DBS, Deep Brain Stimulation; GLM, generalized linear models.

**Supplementary Table 2.** Akaike’s information criterion (AIC) Goodness of Fit

| Cognitive domain | AKAKIE naive - model summary | AKAKIE corrected - model summary |
| --- | --- | --- |
| **Total ACE-R** | 2936.277 | 2563.292 |
| **Attention & orientation** | 1446.754 | 1319.355 |
| **Memory** | 2113.445 | 2067.591 |
| **Fluency** | 2015.150 | 1993.720 |
| **Language** | 1602.806 | 1411.929 |
| **Visuospatial** | 1796.783 | 1607.229 |

ACE-R, Addenbrooke's Cognitive Examination – Revised

**Supplementary Table 3.** Individual generalized linear mixed models assessing longitudinal association between participant cognitive scores and clinical characteristics.

| **Outcome** | **Model** | **Naïve** | | | | |
| --- | --- | --- | --- | --- | --- | --- |
| **Intercept** | **β-Coefficient** | **SE** | **t value** | ***pb* value** |
| ACE-R total score | Years between follow-up | 89.808 | -0.534 | 0.321 | -1.661 | .098 |
| ACE-R total score | Age at assessment | 114.599 | -0.396 | 0.057 | -6.882 | **<.001** |
| ACE-R total score | Age at onset | 104.507 | -0.270 | 0.053 | -5.099 | **<.001** |
| ACE-R total score | Disease duration | 90.607 | -0.176 | 0.106 | -1.655 | .099 |
| ACE-R total score | LEDD | 89.151 | 2.4E-4 | 0.001 | 0.155 | .877 |
| ACE-R total score | No DBS* | 88.639 | 0.669 | 2.011 | 0.333 | .740 |
| Attention & orientation | Years between follow-up | 17.371 | -0.059 | 0.048 | -1.245 | .214 |
| Attention & orientation | Age at assessment | 19.707 | -0.038 | 0.009 | -3.941 | **<.001** |
| Attention & orientation | Age at onset | 18.884 | -0.028 | 0.009 | -3.277 | **.001** |
| Attention & orientation | Disease duration | 17.349 | -0.006 | 0.017 | -0.386 | .700 |
| Attention & orientation | LEDD | 17.130 | 2.1E-4 | 1.5E-4 | 1.400 | .163 |
| Attention & orientation | No DBS* | 17.361 | -0.069 | 0.310 | -0.223 | .824 |
| Memory score | Years between follow-up | 21.918 | -0.216 | 0.132 | -1.635 | .103 |
| Memory score | Age at assessment | 32.359 | -0.167 | 0.025 | -6.642 | **<.001** |
| Memory score | Age at onset | 27.971 | -0.112 | 0.023 | -4.810 | **<.001** |
| Memory score | Disease duration | 22.272 | -0.079 | 0.046 | -1.725 | .086 |
| Memory score | LEDD | 21.623 | 3.8E-5 | 4.2E-4 | 0.090 | .928 |
| Memory score | No DBS* | 20.322 | 1.479 | 0.859 | 1.722 | .086 |
| Fluency score | Years between follow-up | 10.486 | 0.105 | 0.090 | 1.160 | .247 |
| Fluency score | Age at assessment | 15.998 | -0.082 | 0.019 | -4.257 | **<.001** |
| Fluency score | Age at onset | 13.544 | -0.051 | 0.018 | -2.907 | **.004** |
| Fluency score | Disease duration | 11.047 | -0.047 | 0.033 | -1.405 | .161 |
| Fluency score | LEDD | 10.504 | 2.0E-4 | 3.0E-4 | 0.645 | .520 |
| Fluency score | No DBS* | 10.502 | 0.175 | 0.616 | 0.285 | .776 |
| Language score | Years between follow-up | 25.073 | -0.183 | 0.076 | -2.416 | **.016** |
| Language score | Age at assessment | 27.485 | -0.039 | 0.011 | -3.700 | **<.001** |
| Language score | Age at onset | 26.634 | -0.029 | 0.009 | -3.035 | **.003** |
| Language score | Disease duration | 25.062 | -0.011 | 0.019 | -0.544 | .587 |
| Language score | LEDD | 25.144 | -2.0E-4 | 1.7E-4 | -1.167 | .244 |
| Language score | No DBS* | 25.173 | -0.204 | 0.368 | -0.554 | .580 |
| Visuospatial-perceptual score | Years between follow-up | 14.934 | -0.160 | 0.071 | -2.257 | **.025** |
| Visuospatial-perceptual score | Age at assessment | 19.605 | -0.076 | 0.014 | -5.508 | **<.001** |
| Visuospatial-perceptual score | Age at onset | 17.667 | -0.052 | 0.013 | -4.109 | **<.001** |
| Visuospatial-perceptual score | Disease duration | 14.998 | -0.033 | 0.025 | -1.322 | .187 |
| Visuospatial-perceptual score | LEDD | 14.592 | 1.9E-4 | 2.3E-4 | 0.854 | .394 |
| Visuospatial-perceptual score | No DBS* | 15.344 | -0.663 | 0.462 | -1.435 | .152 |

b*p* value taken from GLMM without correction for covariates.

*Comparison category set to zero.

β, beta; SE, standard error; LEDD, Levodopa Equivalent Daily Dose; DBS, Deep Brain Stimulation; GLMM, generalized linear mixed models.

**Supplementary Table 4.** Akaike’s information criterion (AIC) Goodness of Fit

| Cognitive domain | AKAKIE naïve - model summary | AKAKIE corrected - model summary |
| --- | --- | --- |
| **Total ACE-R** | 1868.144 | 1823.064 |
| **Attention & orientation** | 931.509 | 922.970 |
| **Memory** | 1443.177 | 1401.292 |
| **Fluency** | 1284.476 | 1268.829 |
| **Language** | 1063.966 | 1054.611 |
| **Visuospatial** | 1131.943 | 1106.828 |

ACE-R, Addenbrooke's Cognitive Examination – Revised.
